# Supplementary figures and images for: Niobic acid as a support for microheterogeneous nanocatalysis of sodium borohydride hydrolysis under mild conditions
Source: Royal Society of Chemistry journal article supplement (doi:10.1039/d4ra01879f), 2024-01-01

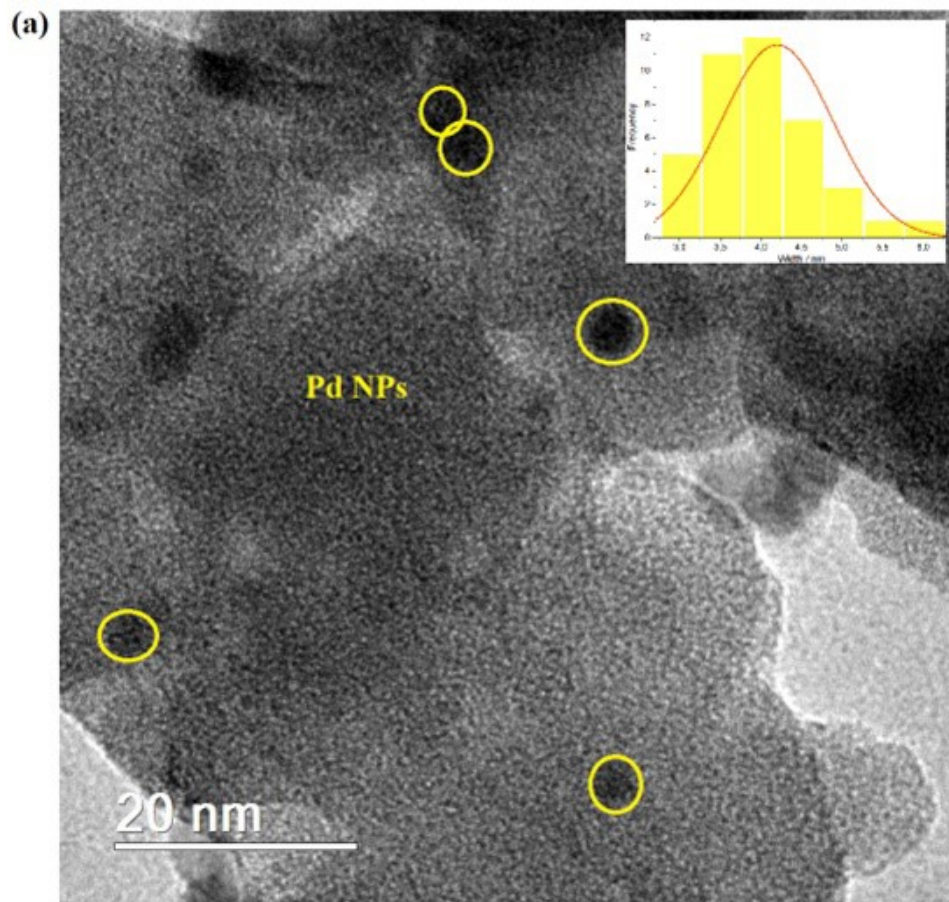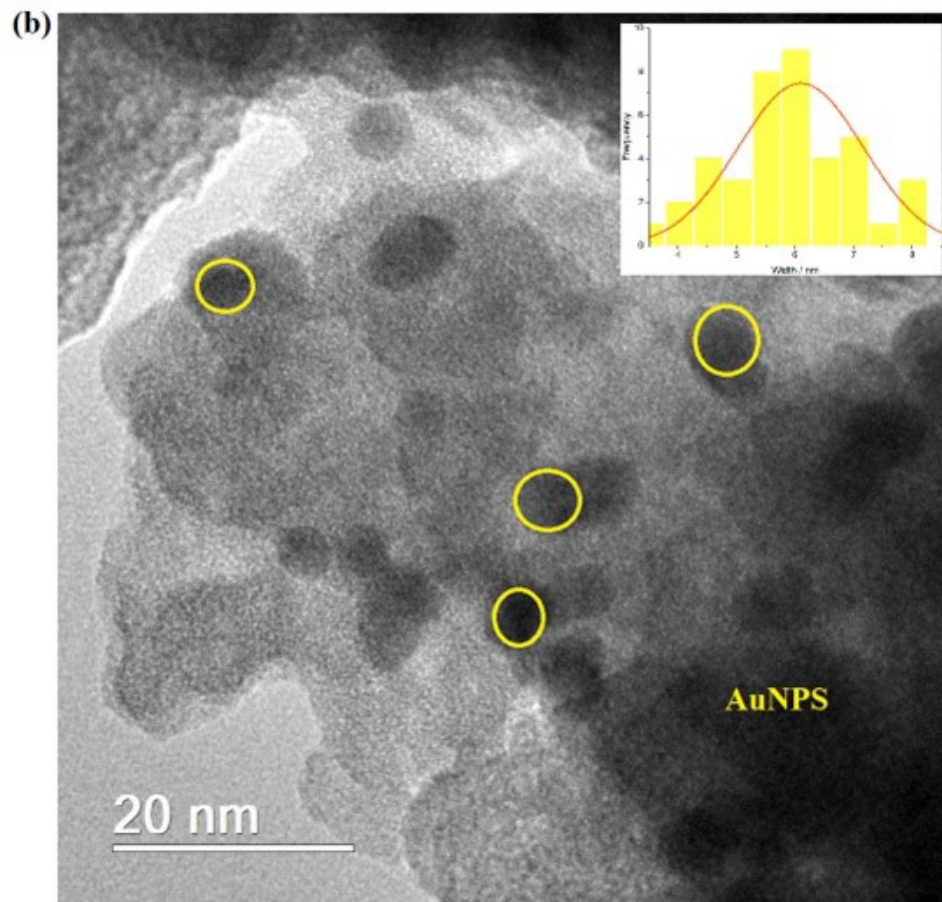

Supplement: d4ra01879f3.pdf [file d4ra01879f3.pdf]

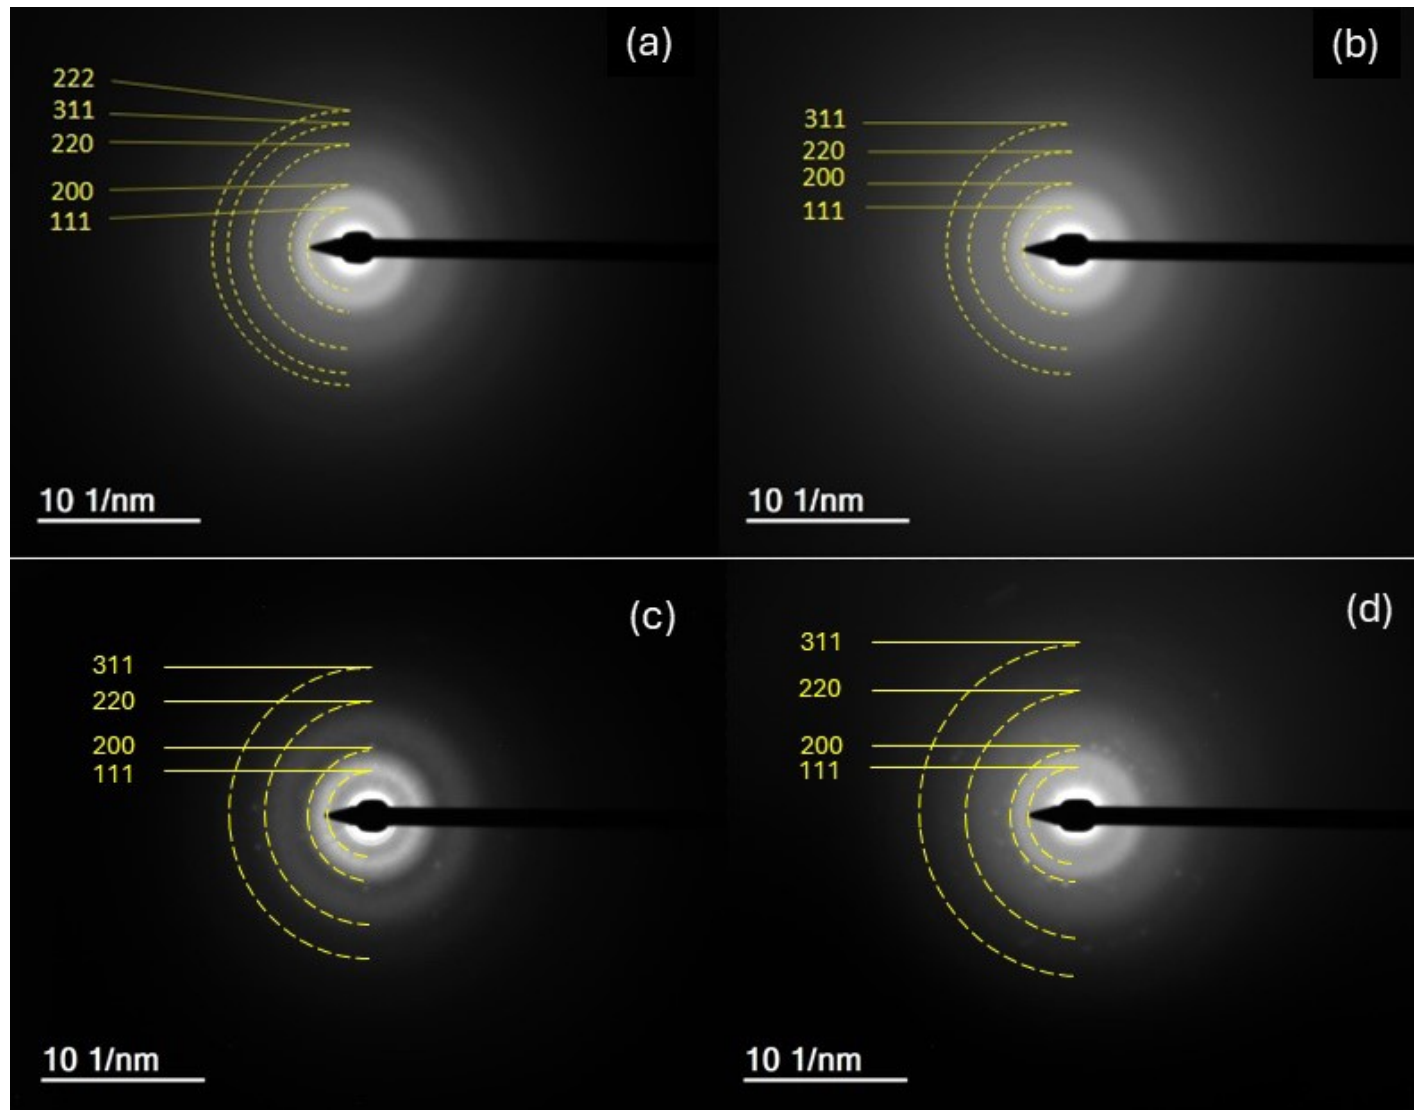

Supplement: d4ra01879f4.pdf [file d4ra01879f4.pdf]

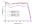

Supplement: d4ra01879f5.pdf [file d4ra01879f5.pdf]

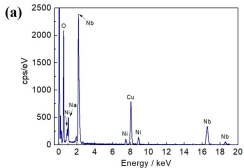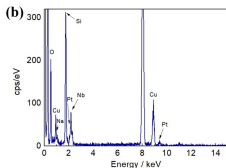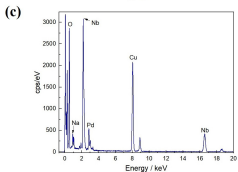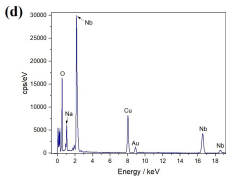

Supplement: d4ra01879f7.pdf [file d4ra01879f7.pdf]

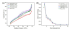

Supplement: d4ra01879f8.pdf [file d4ra01879f8.pdf]
